# Supplementary material
Source: publisher figshare collection journal article supplement (https://acs.figshare.com/ndownloader/files/4379122)
Supplement: Supplementary file 1 [file 4379122]

# Supporting Information

For

## Simultaneous Tailoring of Phase Evolution and Dopant Distribution in the Glassy Phase for Controllable Luminescence

Shifeng Zhou,<sup>\*,†</sup> Nan Jiang,<sup>‡</sup> Kiyotaka Miura,<sup>\*,†</sup> Setsuhisa Tanabe,<sup>§</sup> Masahiro Shimizu,<sup>†</sup> Masaaki Sakakura,<sup>†</sup> Yasuhiko Shimotsuma,<sup>†</sup> Masayuki Nishi,<sup>†</sup> Jianrong Qiu,<sup>||</sup> and Kazuyuki Hirao<sup>†</sup>

<sup>†</sup>*Department of Material Chemistry, Graduate School of Engineering, Kyoto University, Nishikyo-ku, Kyoto 615-8510, Japan*

<sup>‡</sup>*Department of Physics, Arizona State University, Tempe, Arizona 85287-1504, United States*

<sup>§</sup>*Graduate School of Human and Environmental Studies, Kyoto University, Yoshida-Nihonmatsu-Cho Sakyo-ku, Kyoto 606-8501, Japan*

<sup>||</sup>*Department of Materials Science and Engineering, Zhejiang University, Hangzhou 310027, China*

---

\* Corresponding authors: E-mail: [zhoushifeng@curl1.kuic.kyoto-u.ac.jp](mailto:zhoushifeng@curl1.kuic.kyoto-u.ac.jp) (S. Zhou), [kmiura@collon1.kuic.kyoto-u.ac.jp](mailto:kmiura@collon1.kuic.kyoto-u.ac.jp) (K. Miura)

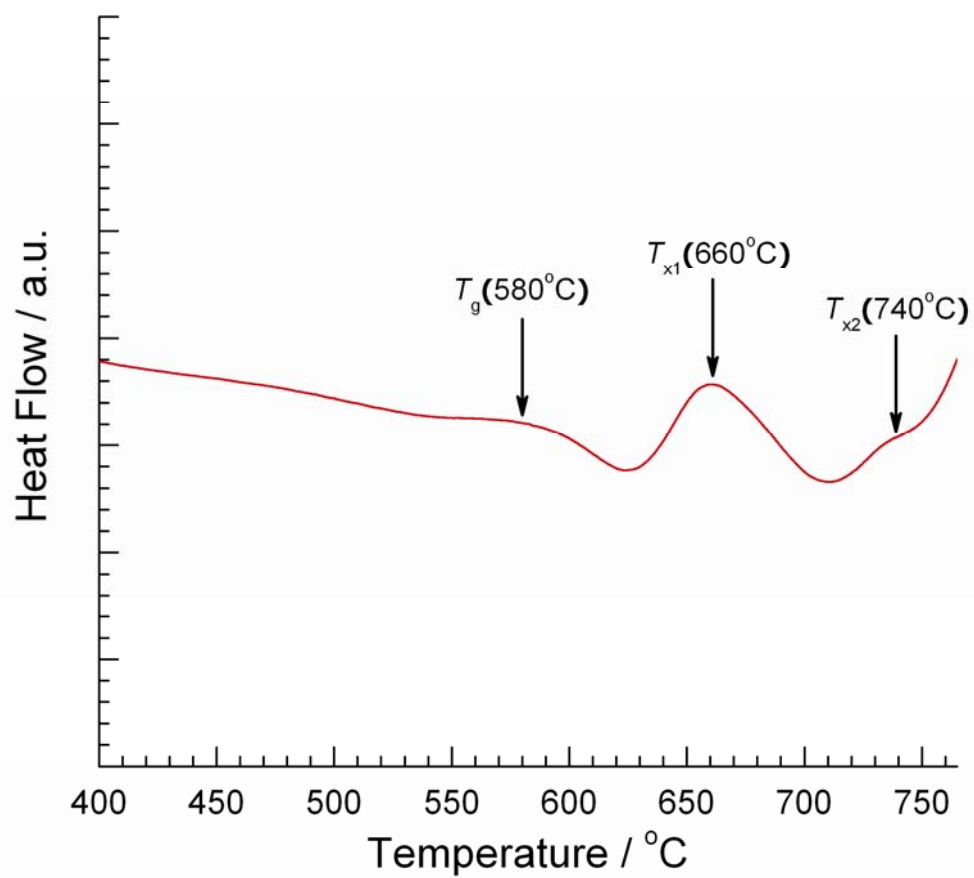

**Figure S1.** Differential thermal analysis of the as-made glassy phase, where  $T_g$ ,  $T_{x1}$  and  $T_{x2}$  represent the glass-transition, the first and the second crystallization temperatures, respectively.

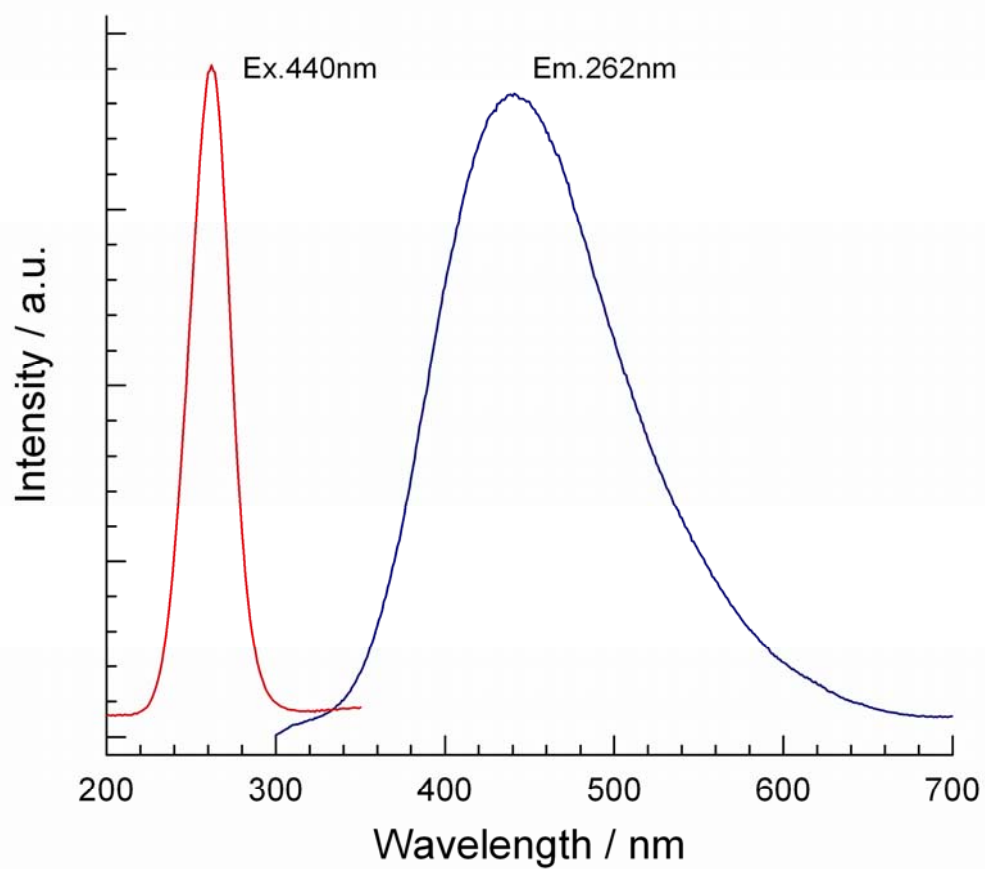

**Figure S2.** Photoluminescence excitation (PLE) and photoluminescence (PL) spectra of the non-doped composite heat-treated at 700 °C.

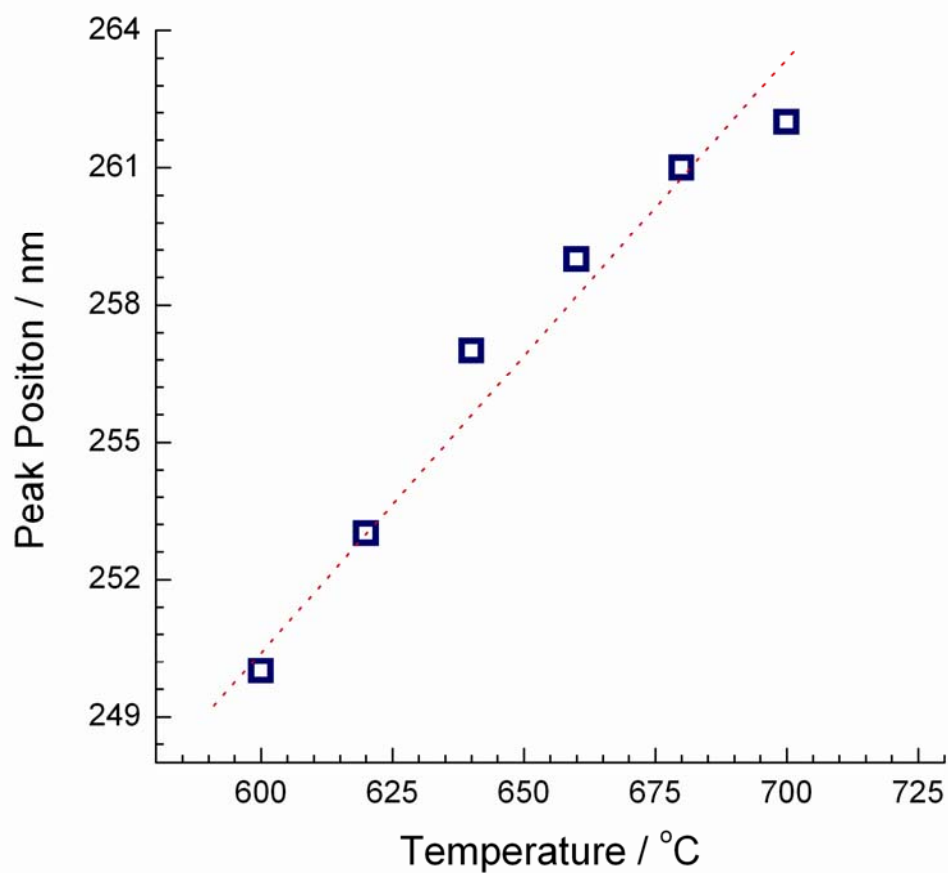

**Figure S3.** Heat-treatment temperature-dependent peak position of PLE spectra of the non-doped composite. The PLE spectra were measured by monitoring the luminescence at the wavelength corresponding to the peak positions shown in Fig. 2(a).

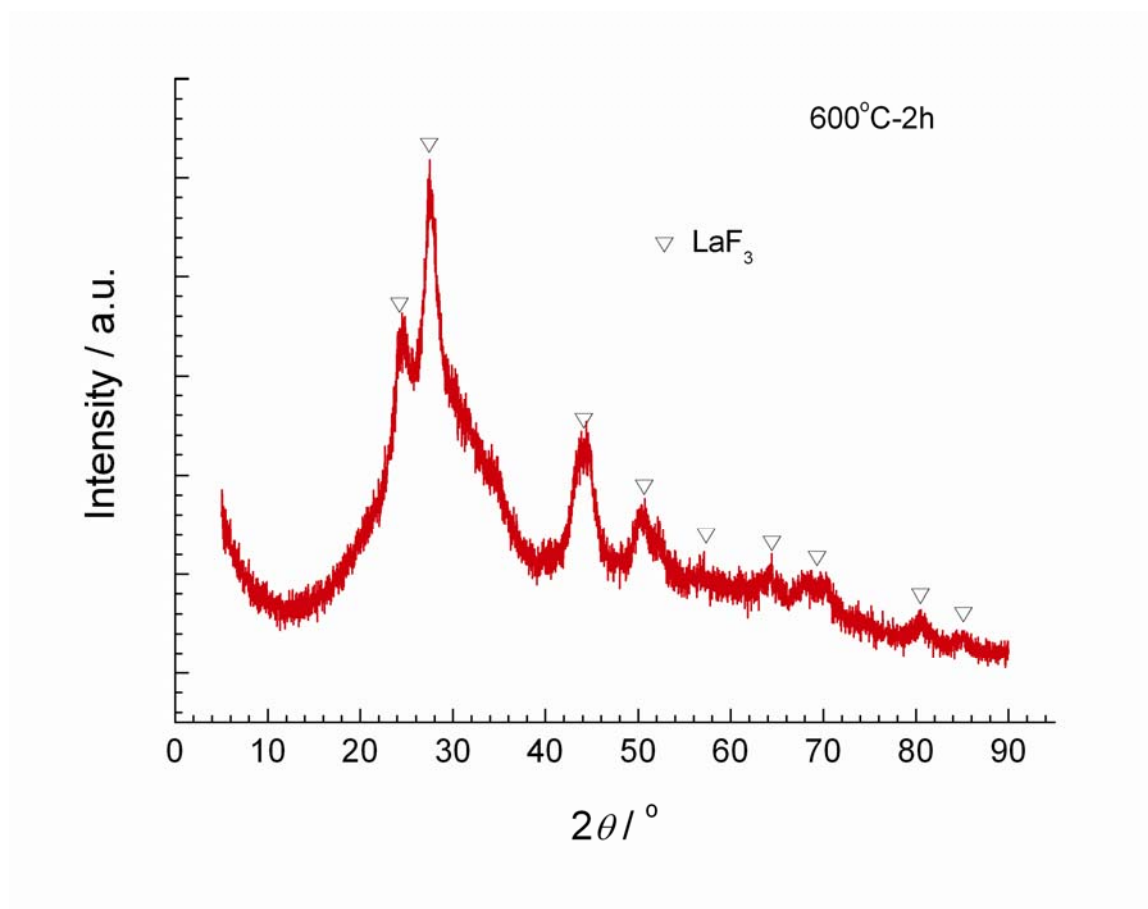

**Figure S4.** XRD pattern of the composite heat-treated at 600 °C for 2 h.

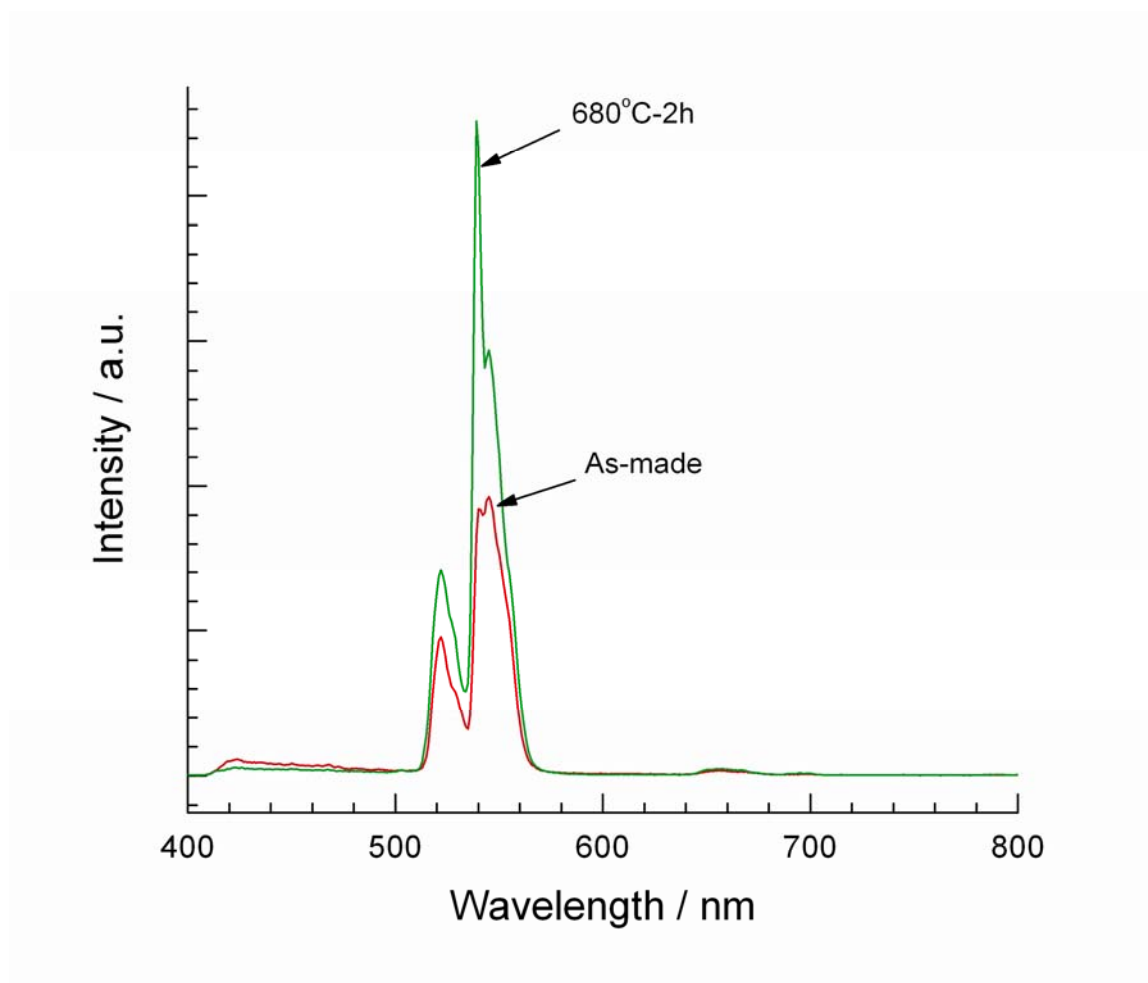

**Figure S5.** Luminescence spectra of Er<sup>3+</sup>-doped as-made glass (red line) and the composite heat-treated at 680 °C for 2 h (green line).

**Table S1.** Reduced matrix elements of  $\text{Er}^{3+}$ .<sup>1</sup>

|                  | $(S'L')J'$          | $(SL)J$             | $[U^{(2)}]^2$ | $[U^{(2)}]^4$ | $[U^{(2)}]^6$ | $\lambda(\text{nm})$ |
|------------------|---------------------|---------------------|---------------|---------------|---------------|----------------------|
| $\text{Er}^{3+}$ | $^4\text{S}_{3/2}$  | $^4\text{I}_{15/2}$ | 0.0           | 0.0           | 0.2232        | 540                  |
|                  | $^2\text{H}_{11/2}$ | $^4\text{I}_{15/2}$ | 0.7236        | 0.4222        | 0.0927        | 520                  |

The Change of ligand field around rare-earth ions can be discussed by using Judd-Ofelt theory.<sup>2,3</sup> According to this theory, the transition probabilities are determined by the reduced matrix elements of unit tensor operators  $\langle U^{(t)} \rangle^2$  and intensity parameter  $\Omega_t$ , given by equation (1).

$$A_{jj'} = \frac{64\pi^4 e^2}{3h(2J' + 1)\lambda^3} \frac{n(n^2 + 2)^2}{9} \times \sum_{t=2,4,6} \Omega_t \left| \langle (SL)J \| U^{(t)} \| (S'L')J' \rangle \right|^2 \quad (1)$$

The calculated matrix elements of  $\text{Er}^{3+}$ ,<sup>1</sup> as presented in Table S1, show that the 520 and 540 nm transitions are dominated by  $\Omega_2$  and  $\Omega_6$ , respectively. These two parameters indicate the symmetry and covalency properties between  $\text{Er}^{3+}$  ions and the hosts, respectively.  $\Omega_2$  decreases with the increase of symmetry and  $\Omega_6$  increases with the decrease of covalency. It can be concluded that the change of ligand field around  $\text{Er}^{3+}$  contributes to the variation of fluorescence intensity. For example, the selective incorporation of  $\text{Er}^{3+}$  into  $\text{LaF}_3$  nanocrystal in glass may leads to an intensity enhancement of 540 nm peak because of the decrease of covalency.

**Table S2** The experimentally observed and calculated crystal field parameter ( $D_q$ ), Racah parameters ( $B$  and  $C$ ) and energy levels of  $\text{Ni}^{2+}$  in composite treated at 710 °C.

|                                                                 | Experimental ( $\text{cm}^{-1}$ ) | Theoretical ( $\text{cm}^{-1}$ ) |
|-----------------------------------------------------------------|-----------------------------------|----------------------------------|
| $D_q$                                                           | 976                               | -                                |
| $B$                                                             | 894                               | -                                |
| $C$                                                             | 2982                              | -                                |
| ${}^3\text{A}_2(\text{F}) \rightarrow {}^3\text{T}_2(\text{F})$ | 9728                              | 9728                             |
| $\rightarrow {}^1\text{E}(\text{D})$                            | 12658                             | 13824                            |
| $\rightarrow {}^3\text{T}_1(\text{F})$                          | 15924                             | 15917                            |
| $\rightarrow {}^1\text{T}_2(\text{D})$                          | 22075                             | 23236                            |
| $\rightarrow {}^3\text{T}_1(\text{P})$                          | 26738                             | 26802                            |

To calculate the crystal field and Racah parameters of  $\text{Ni}^{2+}$ , the Tanabe-Sugano matrix was solved to obtain the following expressions:<sup>4-6</sup>

$$D_q = \frac{v_1}{10} \quad (1)$$

$$B = \frac{(v_3 - 2v_1)(v_3 - v_1)}{3(5v_3 - 9v_1)} \quad (2)$$

$$C = \frac{v_4}{2} - 5D_q - \frac{17}{4}B + \frac{1}{4}(400D_q^2 + 40D_qB + 49B^2)^{1/2} \quad (3)$$

where  $v_1$ ,  $v_3$  and  $v_4$  represent the electron transitions from  ${}^3\text{A}_{2g}(\text{F})$  ground state to  ${}^3\text{T}_{2g}(\text{F})$ ,  ${}^3\text{T}_{1g}(\text{F})$  and  ${}^3\text{T}_{1g}(\text{P})$  excited states, respectively. The  $D_q$ ,  $B$  and  $C$  parameters can be calculated by applying the experimentally observed electron transitions of  $\text{Ni}^{2+}$  to the obtained expressions. The results are shown in Table S2.

By using the calculated crystal field and Racah parameters and the standard Tanabe-Sugano diagram of octahedral  $\text{Ni}^{2+}$ , the theoretical energy levels can be determined. As shown in Table S2, the fitted



energy levels are consistent with the observed absorption peaks. The location of the energy levels of  $\text{Ni}^{2+}$  in the composite treated at 710 °C is indicated in the standard Tanabe-Sugano diagram (Fig. S6).

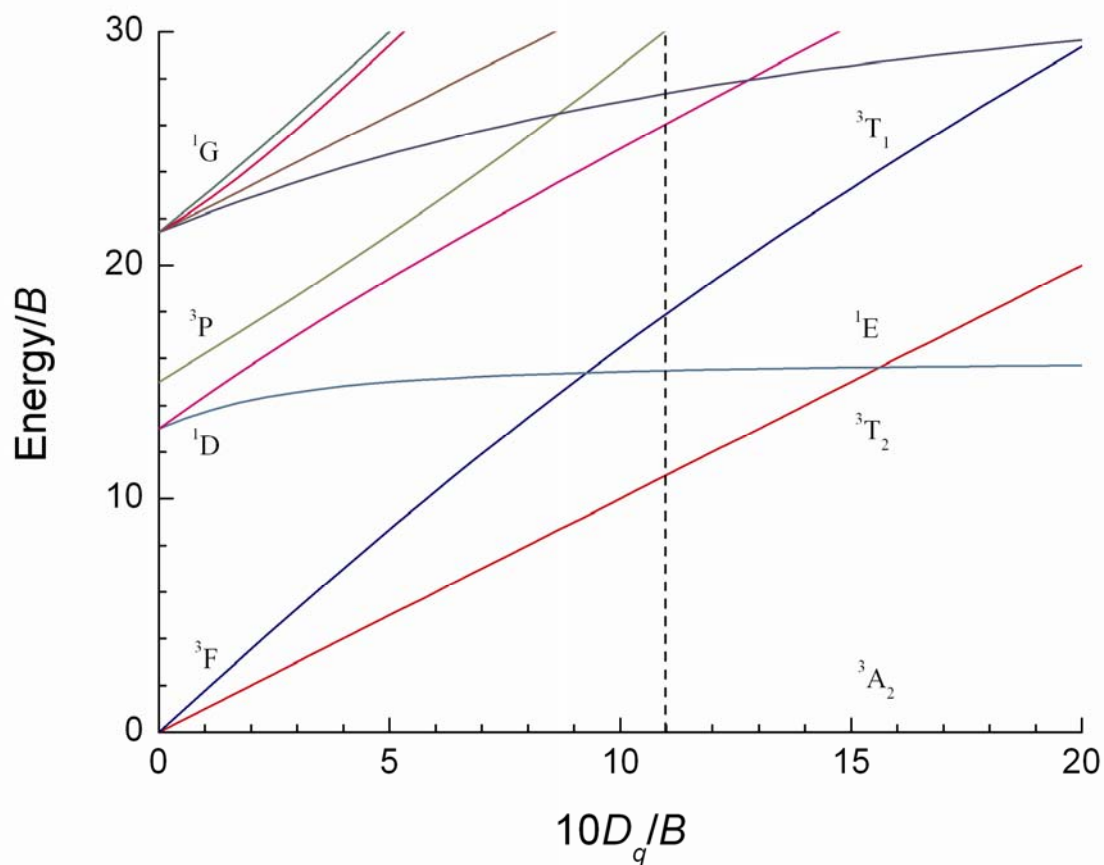

**Figure S6.** Tanabe-Sugano diagram of octahedral  $\text{Ni}^{2+}$ . Vertical dashed line shows the location of the energy levels of  $\text{Ni}^{2+}$  in the composite treated at 710 °C.

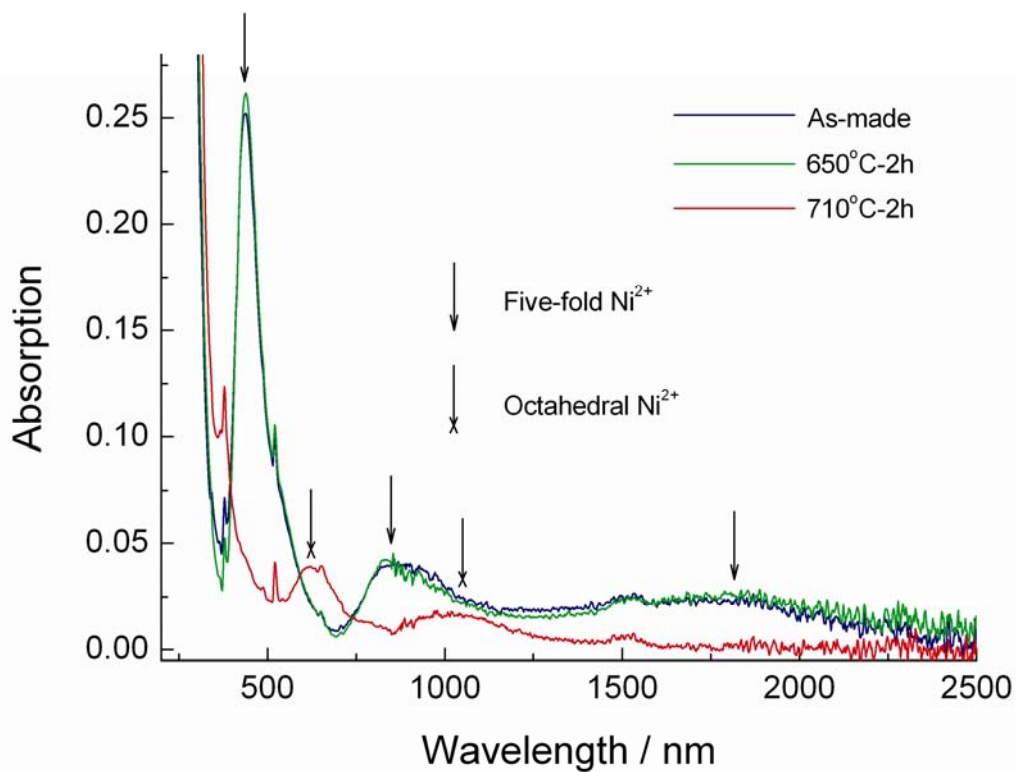

**Figure S7.** Absorption spectra of  $\text{Ni}^{2+}$ - $\text{Er}^{3+}$  codoped glass and the composite heat-treated at 650 and 710  $^{\circ}\text{C}$ , respectively. The arrows indicate the origin of absorption bands. The results show that the characteristic absorption bands of five-fold  $\text{Ni}^{2+}$  absolutely disappear during the precipitation of  $\text{Ga}_2\text{O}_3$  nanocrystals, demonstrating the selective partition of  $\text{Ni}^{2+}$  into  $\text{Ga}_2\text{O}_3$ .

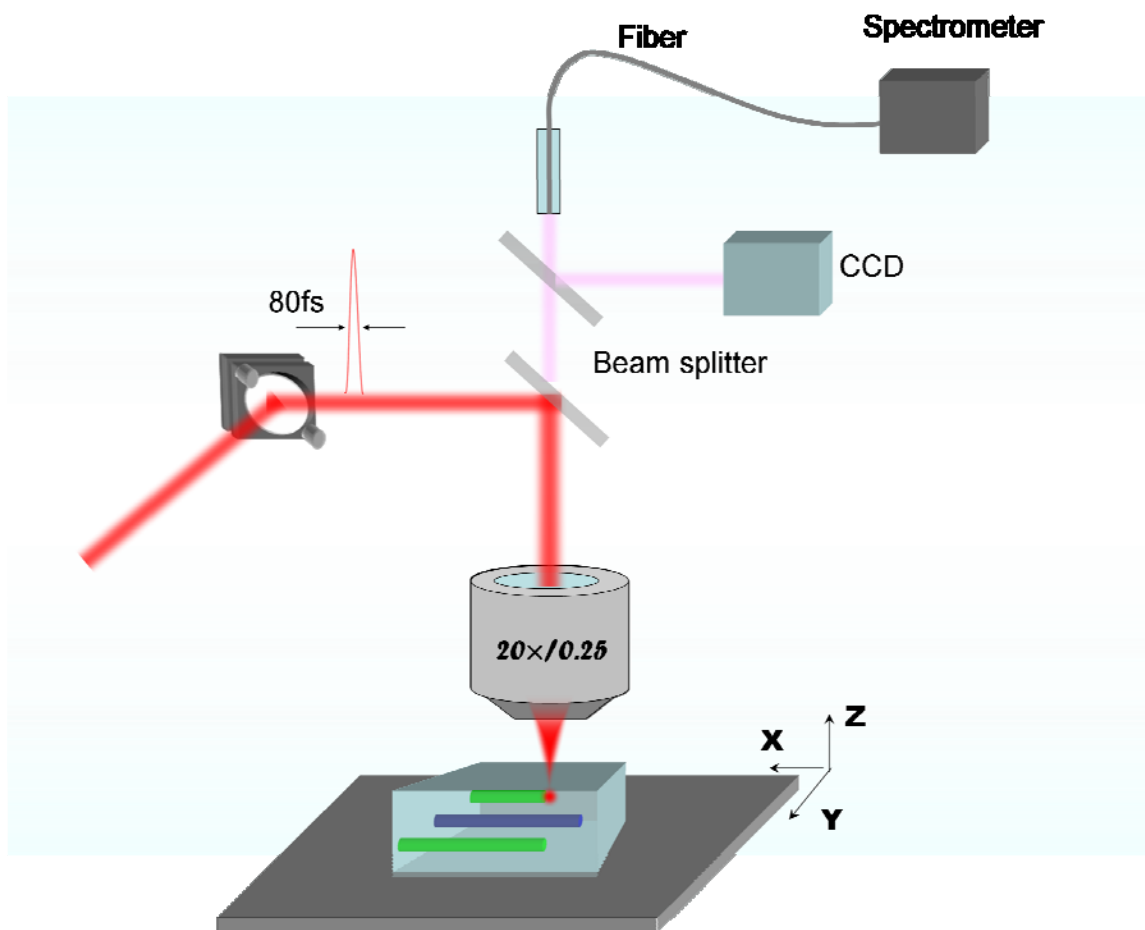

**Figure S8.** Schematic illustration of the experimental setup for space-selective micro-fabrication and upconversion luminescence measurement.

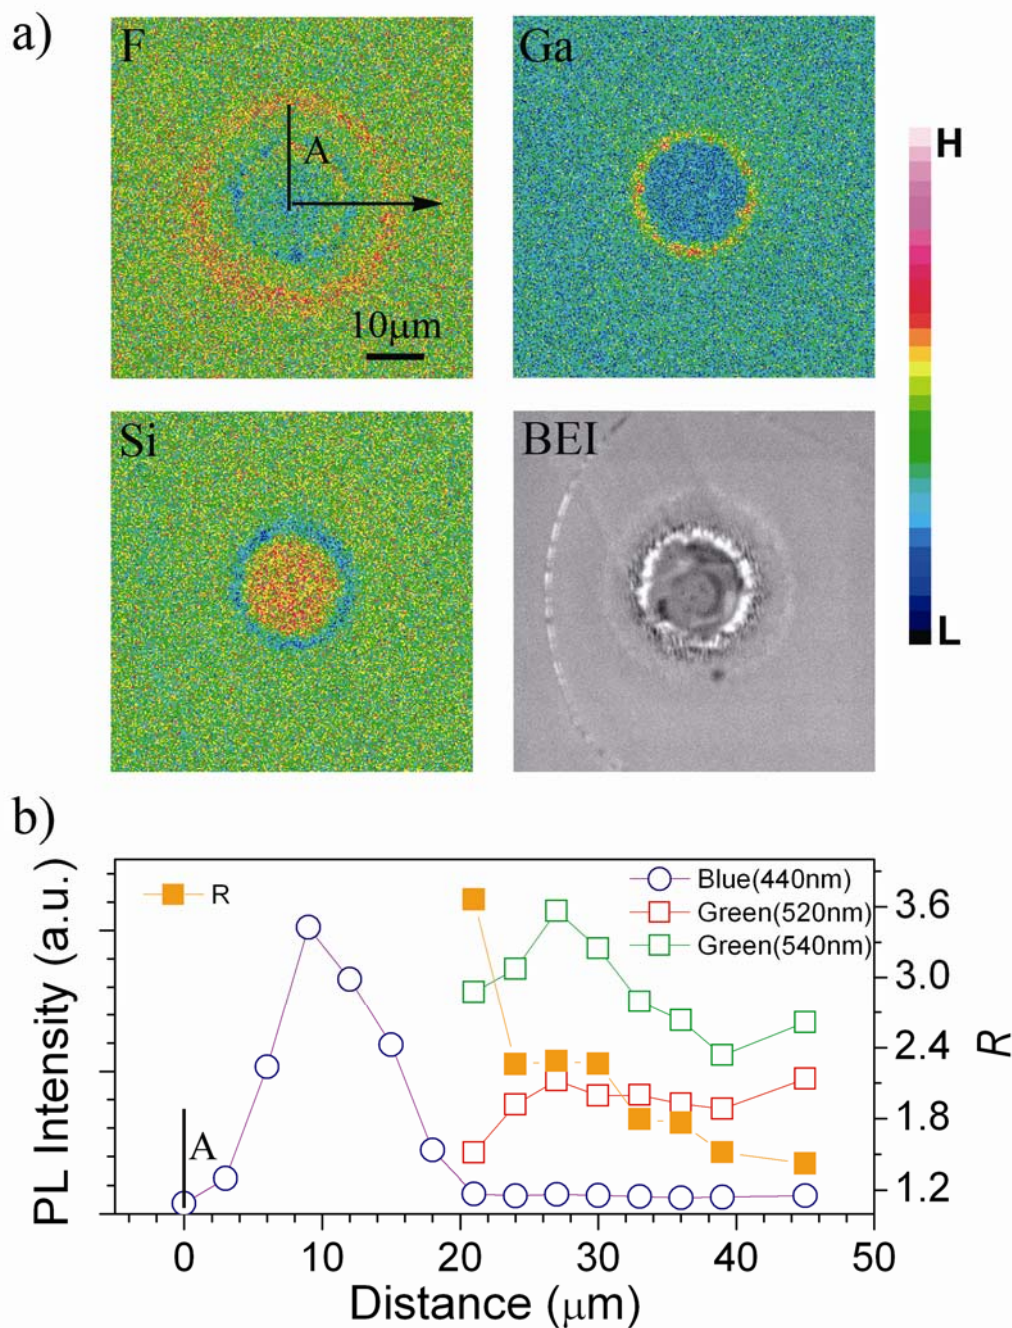

**Figure S9.** a) Ions distribution (F, Ga and Si) map and backscattering electron image (BEI) around the ultra-short pulse laser modified region, measured by EPMA. b) Photoluminescence investigation of the modified region via scanning the excitation laser from point A and along the direction marked by black arrow shown in a).

## References:

- (1) Tanabe S.; Hayashi H., Hanada T.; Onodera N. *Opt. Mater.* **2002**, *19*, 343-349.
- (2) Judd B. R. *Phys. Rev.* **1962**, *127*, 750-761.
- (3) Tanabe S.; Ohyagi T.; Soga N.; Hanada T. *Phys. Rev. B* **1992**, *46*, 3305-3310.
- (4) Tanabe Y.; Sugano S. *J. Phys. Soc. Jpn.* **1954**, *9*, 753-766.
- (5) Tanabe Y.; Sugano S. *J. Phys. Soc. Jpn.* **1954**, *9*, 766-779.
- (6) Shigemura H.; Shojiya M.; Kanno R.; Kawamoto Y. *J. Phys. Chem. B* **1998**, *102*, 1920-1925.
